# Supplementary material
Source: PubMed Central journal article supplement (PMC6697628)
Supplement: NIHMS1043621-supplement-supplement.pdf [file NIHMS1043621-supplement-supplement.pdf]

## Supplementary Figures

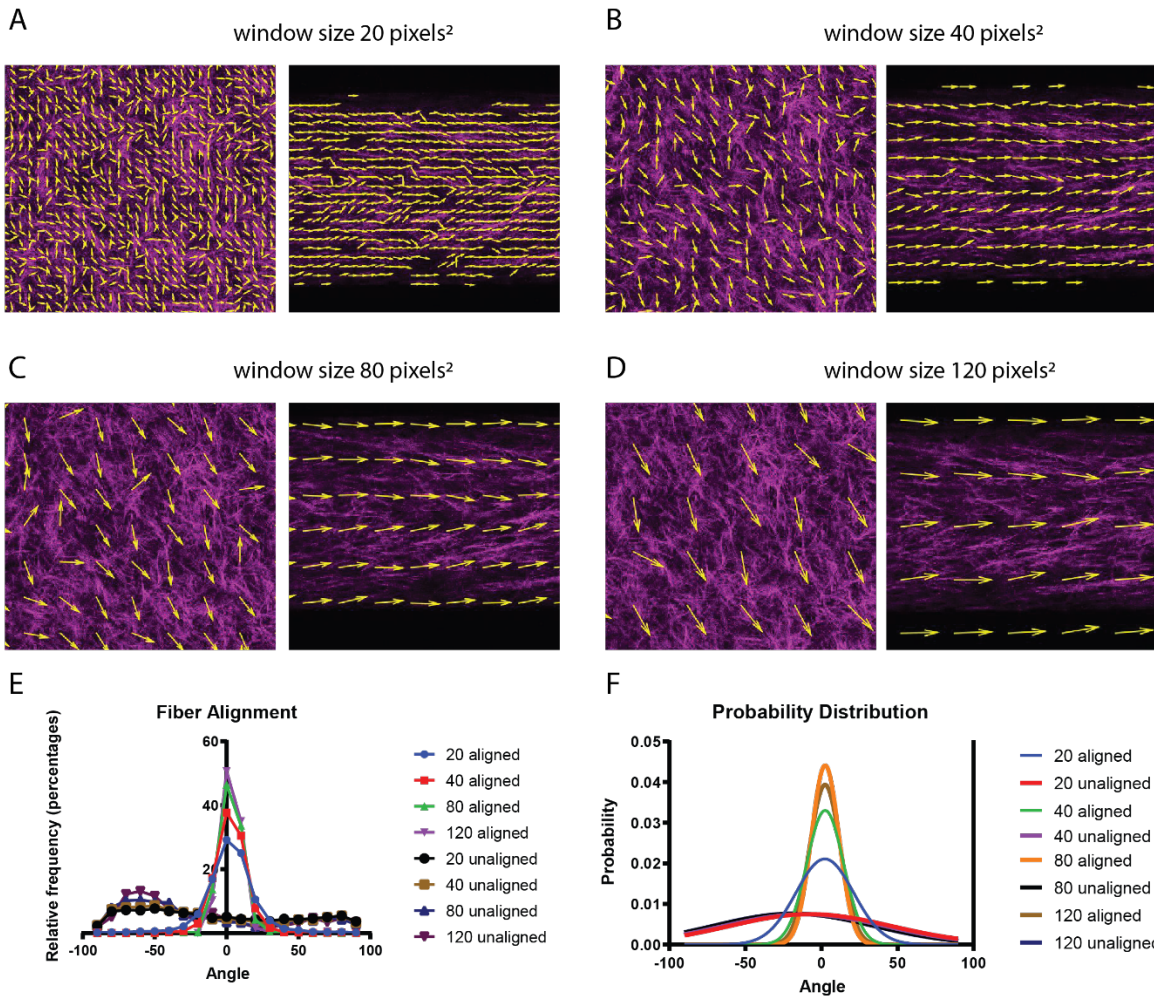

**Supplementary Figure 1. Analysis of Collagen Alignment (A-D)** To assess different levels of collagen fiber alignment, interrogation window size was altered, and alignment subsequently plotted. Results of different window interrogation sizes are plotted. (E) Frequency distribution of collagen fiber angles plotted as percentages for all window sizes (F) The probability distribution for all conditions is plotted.

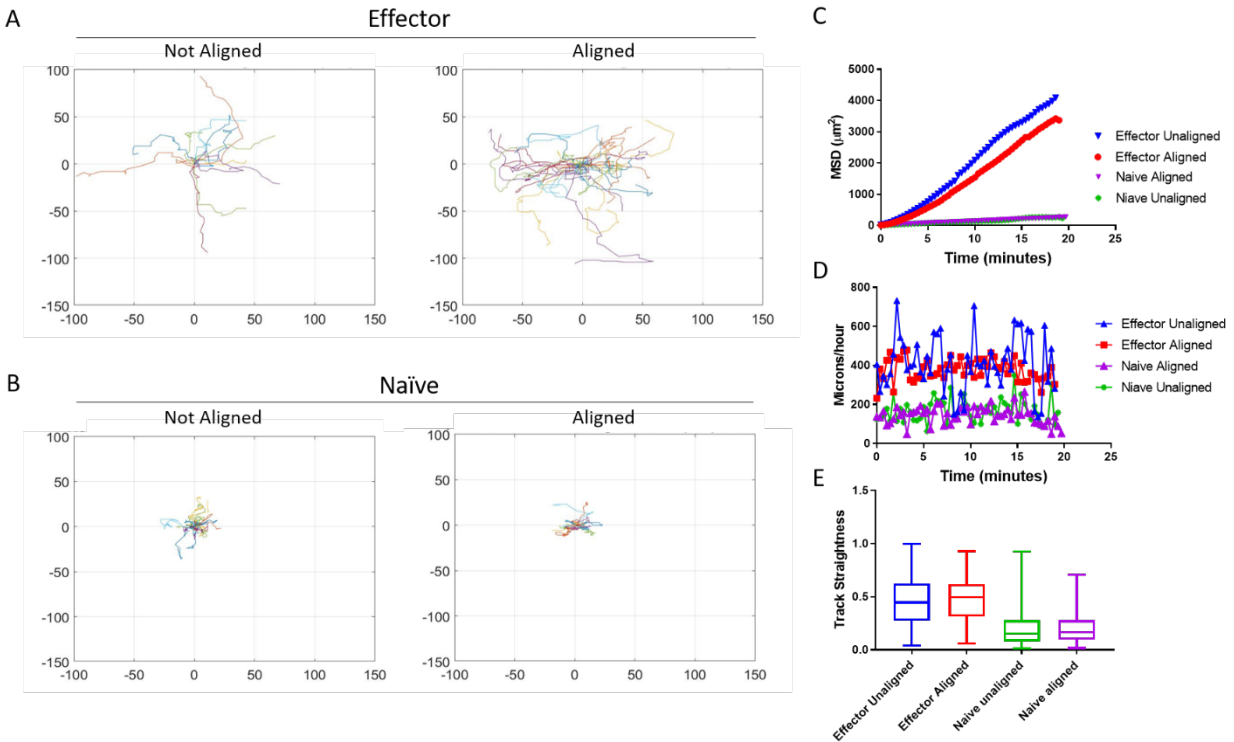

**Supplementary Figure 2. Migration of Effector and Naïve CD8+ T cells in collagen hydrogels.** (A-B) Murine effector and naïve CD8+ T cells were isolated and encapsulated into aligned and unaligned collagen gels. Trajectories from twenty minute time lapses are shown for both effector and naïve cells. (C) Mean squared displacement of all conditions over the time lapse (D) Velocity profiles of naïve and effector populations in aligned and unaligned conditions (E) Linearity of trajectories in all conditions.
